# Supplementary material
Source: Springer Nature journal article supplement (https://www.springermedizin.de/resource/supplementary/12969_2013_1004_MOESM1_ESM.pdf/9589190)

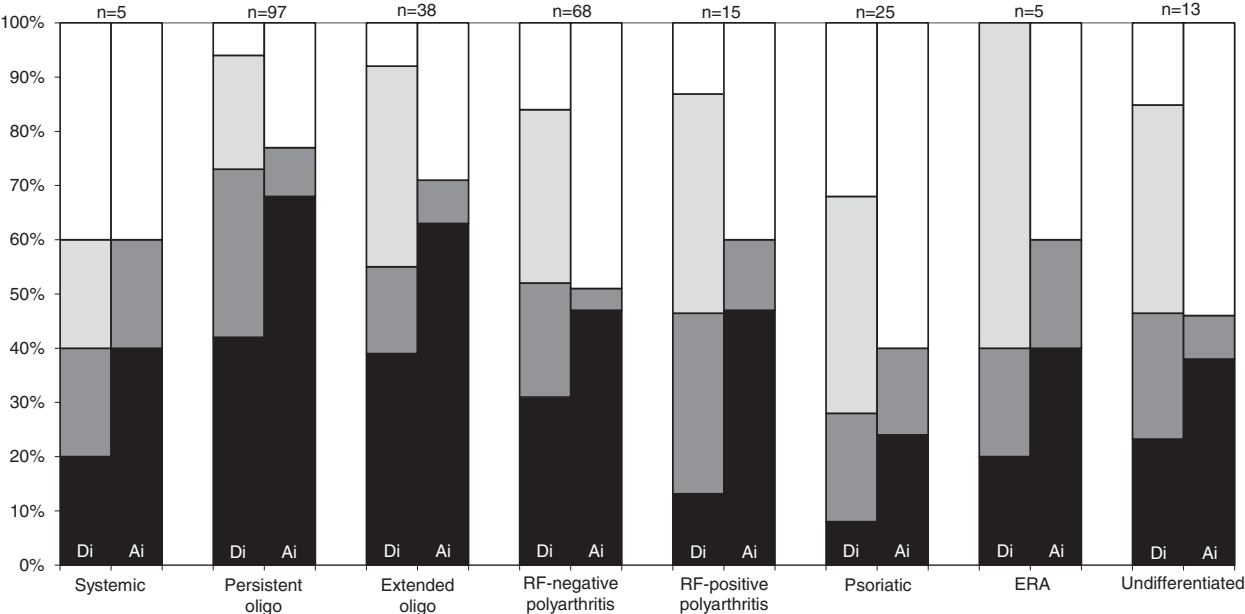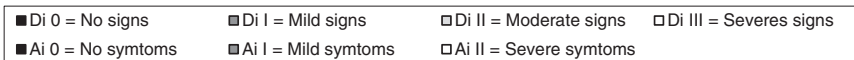

Supplement: MOESM1 [file 9589190]
